# Supplementary material
Source: MDPI journal article supplement (https://www.mdpi.com/2571-550X/3/1/3)
Supplement: s1 [file s1]

## Supplementary

**Table:** Description of sediment samples from Gradistat analysis based on the Fork and Ward method. Sample identification contains the excavation pit, layer number and spit number of each studied cultural layer except the channel sediments.

| Sediment Sample | Textural Group   | Sorting            | Skewness           | Kurtosis    |
|-----------------|------------------|--------------------|--------------------|-------------|
| P300 3:1        | Coarse Silt      | Very Poorly Sorted | Symmetrical        | Mesokurtic  |
| P300 3:5        | Very Fine Sand   | Very Poorly Sorted | Fine Skewed        | Leptokurtic |
| P300 5:2 HF     | Very Coarse Silt | Very Poorly Sorted | Fine Skewed        | Leptokurtic |
| P300 5:2        | Very Coarse Silt | Very Poorly Sorted | Fine Skewed        | Leptokurtic |
| P300 6:5        | Fine Sand        | Very Poorly Sorted | Symmetrical        | Leptokurtic |
| P300 7:2        | Very Fine Sand   | Very Poorly Sorted | Fine Skewed        | Mesokurtic  |
| S400 1:6        | Very Coarse Silt | Very Poorly Sorted | Fine Skewed        | Mesokurtic  |
| S400 2:3        | Coarse Silt      | Very Poorly Sorted | Symmetrical        | Platykurtic |
| S400 2:6        | Coarse Silt      | Very Poorly Sorted | Symmetrical        | Mesokurtic  |
| S400 2:11       | Very Coarse Silt | Very Poorly Sorted | Fine Skewed        | Mesokurtic  |
| S400 3:2 HF     | Coarse Silt      | Very Poorly Sorted | Symmetrical        | Platykurtic |
| S400 3:3        | Very Coarse Silt | Very Poorly Sorted | Fine Skewed        | Mesokurtic  |
| S400 6:1        | Coarse Silt      | Very Poorly Sorted | Symmetrical        | Platykurtic |
| G104 1:4        | Very Coarse Silt | Poorly Sorted      | Fine Skewed        | Mesokurtic  |
| G104 2:5        | Very Coarse Silt | Very Poorly Sorted | Fine Skewed        | Mesokurtic  |
| G104 3:3        | Very Coarse Silt | Very Poorly Sorted | Fine Skewed        | Mesokurtic  |
| G104 4:5        | Coarse Silt      | Very Poorly Sorted | Fine Skewed        | Mesokurtic  |
| G104 5:1        | Very Coarse Silt | Very Poorly Sorted | Fine Skewed        | Mesokurtic  |
| G104 6:1 HF     | Coarse Silt      | Very Poorly Sorted | Symmetrical        | Mesokurtic  |
| G104 7:2        | Very Coarse Silt | Very Poorly Sorted | Very Fine Skewed   | Mesokurtic  |
| G104 7:4        | Very Coarse Silt | Very Poorly Sorted | Very Fine Skewed   | Mesokurtic  |
| N96 1:6         | Very Coarse Silt | Very Poorly Sorted | Symmetrical        | Mesokurtic  |
| N96 2:2         | Very Fine Sand   | Poorly Sorted      | Fine Skewed        | Leptokurtic |
| N96 3:3         | Very Coarse Silt | Poorly Sorted      | Symmetrical        | Mesokurtic  |
| N96 4:4 HF      | Coarse Silt      | Very Poorly Sorted | Very Coarse Skewed | Leptokurtic |
| N96 4:5         | Very Coarse Silt | Very Poorly Sorted | Symmetrical        | Mesokurtic  |
| N96 5:4         | Coarse Silt      | Poorly Sorted      | Symmetrical        | Mesokurtic  |
| N96 6:6         | Very Fine Sand   | Poorly Sorted      | Very Fine Skewed   | Leptokurtic |
| N96 6:13        | Very Coarse Silt | Very Poorly Sorted | Fine Skewed        | Platykurtic |
| U200 BC         | Coarse Silt      | Very Poorly Sorted | Symmetrical        | Mesokurtic  |
| U200 BC         | Very Coarse Silt | Very Poorly Sorted | Coarse Skewed      | Platykurtic |
| U200 BC         | Medium Silt      | Very Poorly Sorted | Symmetrical        | Mesokurtic  |
| U200 WC         | Very Coarse Silt | Very Poorly Sorted | Symmetrical        | Leptokurtic |

|               |                  |                    |                  |             |
|---------------|------------------|--------------------|------------------|-------------|
| U200 WC       | Coarse Silt      | Very Poorly Sorted | Symmetrical      | Mesokurtic  |
| U200 WC       | Very Coarse Silt | Very Poorly Sorted | Fine Skewed      | Mesokurtic  |
| U200 WC       | Very Coarse Silt | Very Poorly Sorted | Fine Skewed      | Leptokurtic |
| U200 CF       | Very Coarse Silt | Very Poorly Sorted | Fine Skewed      | Mesokurtic  |
| U200 CF       | Very Coarse Silt | Very Poorly Sorted | Fine Skewed      | Mesokurtic  |
| U200 CF       | Very Coarse Silt | Very Poorly Sorted | Very Fine Skewed | Mesokurtic  |
| U200 CF       | Very Coarse Silt | Very Poorly Sorted | Fine Skewed      | Mesokurtic  |
| U200 AC       | Very Coarse Silt | Very Poorly Sorted | Symmetrical      | Mesokurtic  |
| U200 AC       | Very Coarse Silt | Very Poorly Sorted | Symmetrical      | Mesokurtic  |
| HI100 1:7     | Very Fine Sand   | Poorly Sorted      | Very Fine Skewed | Leptokurtic |
| HI100 2:4     | Very Fine Sand   | Poorly Sorted      | Very Fine Skewed | Leptokurtic |
| HI100 3:9     | Very Coarse Silt | Very Poorly Sorted | Fine Skewed      | Mesokurtic  |
| HI100 3:10    | Very Fine Sand   | Very Poorly Sorted | Fine Skewed      | Leptokurtic |
| HI100 3:10 HF | Very Coarse Silt | Very Poorly Sorted | Fine Skewed      | Mesokurtic  |
| HI100 4:1     | Very Fine Sand   | Poorly Sorted      | Very Fine Skewed | Leptokurtic |
